# Supplementary material for: Complexes of (η5-Cp*)Ir(iii) with 1-benzyl-3-phenylthio/selenomethyl-1,3-dihydrobenzoimidazole-2-thione/selenone: catalyst for oxidation and 1,2-substituted benzimidazole synthesis
Source: Royal Society of Chemistry journal article supplement (doi:10.1039/c6dt04271f), 2017-01-01
Supplement: c6dt04271f1.pdf [file c6dt04271f1.pdf]

**ESI for**

**Complexes of ( $\eta^5$ -Cp\*)Ir(III) with 1-Benzyl-3-Phenylthio/selenomethyl-1,3-Dihydrobenzoimidazole-2-Thione/Selenone: Catalysts for Oxidation and 1,2-Substituted Benzimidazole Synthesis**

Alpesh K. Sharma, Hemant Joshi, Renu Bhaskar and Ajai K. Singh\*

*Department of Chemistry, Indian Institute of Technology Delhi, New Delhi – 110016, India*

*E-mail: [aksingh@chemistry.iitd.ac.in](mailto:aksingh@chemistry.iitd.ac.in)*

## List of content

1. Table S1 of the crystallographic and Refinement Data of **1-4**
2. TableS2 of Bond Lengths and Bond Angles of **1- 4**
3. Table S3 of Non-covalent Interactions C–H···F Distances (Å) of Complexes **1- 4**
4. Figure of Secondary C–H···F Interactions
5. Mass and NMR Spectra
6. NMR of compound (3a-3g, 5a-g, 7a-d)

**Table S1. Crystal data and structural refinement parameters for complexes 1-4**

| Compounds                                            | <b>1</b>                                                                                                                               | <b>2</b>                                                                                                                            | <b>3</b>                                                                                                                             | <b>4</b>                                                                                                                             |
|------------------------------------------------------|----------------------------------------------------------------------------------------------------------------------------------------|-------------------------------------------------------------------------------------------------------------------------------------|--------------------------------------------------------------------------------------------------------------------------------------|--------------------------------------------------------------------------------------------------------------------------------------|
| Empirical formula                                    | C <sub>31</sub> H <sub>33</sub> ClF <sub>6</sub> IrN <sub>2</sub> PSe <sub>2</sub>                                                     | C <sub>31</sub> H <sub>33</sub> ClF <sub>6</sub> IrN <sub>2</sub> PSeS                                                              | C <sub>31</sub> H <sub>33</sub> ClF <sub>6</sub> IrN <sub>2</sub> PSSe                                                               | C <sub>31</sub> H <sub>33</sub> ClF <sub>6</sub> IrN <sub>2</sub> PS <sub>2</sub>                                                    |
| Formula wt.                                          | 964.15                                                                                                                                 | 917.25                                                                                                                              | 917.25                                                                                                                               | 870.35                                                                                                                               |
| Crystal size [mm]                                    | 0.34×0.25×0.22                                                                                                                         | 0.43 × 0.21 × 0.19                                                                                                                  | 0.38×0.24×0.17                                                                                                                       | 0.31×0.28×0.13                                                                                                                       |
| Crystal system                                       | Monoclinic                                                                                                                             | Monoclinic                                                                                                                          | Monoclinic                                                                                                                           | Monoclinic                                                                                                                           |
| Space group                                          | <i>P</i> 21/ <i>n</i>                                                                                                                  | <i>P</i> 21/ <i>n</i>                                                                                                               | <i>P</i> 21/ <i>n</i>                                                                                                                | <i>P</i> 21/ <i>n</i>                                                                                                                |
| Unit Cell dimension                                  | <i>a</i> = 8.0384(18)<br><i>b</i> = 19.300(4)<br><i>c</i> = 22.282(5)<br>$\alpha$ = 90.00°<br>$\beta$ = 91.219(4)<br>$\gamma$ = 90.00° | <i>a</i> = 7.980(4)<br><i>b</i> = 19.271(9)<br><i>c</i> = 22.304(10)<br>$\alpha$ = 90.00<br>$\beta$ = 91.000(9)<br>$\gamma$ = 90.00 | <i>a</i> = 8.0837(16)<br><i>b</i> = 19.099(4)<br><i>c</i> = 22.104(4)<br>$\alpha$ = 90.00<br>$\beta$ = 91.680(3)<br>$\gamma$ = 90.00 | <i>a</i> = 8.0195(14)<br><i>b</i> = 19.158(3)<br><i>c</i> = 22.138(4)<br>$\alpha$ = 90.00<br>$\beta$ = 91.279(3)<br>$\gamma$ = 90.00 |
| Volume [Å <sup>3</sup> ]                             | 3456.1(13)                                                                                                                             | 3429(3)                                                                                                                             | 3411.2(12)                                                                                                                           | 3400.4(10)                                                                                                                           |
| <i>Z</i>                                             | 4                                                                                                                                      | 4                                                                                                                                   | 4                                                                                                                                    | 4                                                                                                                                    |
| Density (Calc.) [Mg m <sup>-3</sup> ]                | 1.853                                                                                                                                  | 1.777                                                                                                                               | 1.786                                                                                                                                | 1.700                                                                                                                                |
| Absorption coeff. [mm <sup>-1</sup> ]                | 6.150                                                                                                                                  | 5.197                                                                                                                               | 5.225                                                                                                                                | 4.232                                                                                                                                |
| <i>F</i> (000)                                       | 1856.0                                                                                                                                 | 1784.0                                                                                                                              | 1784.0                                                                                                                               | 1712.0                                                                                                                               |
| $\theta$ range [°]                                   | 2.30–19.50                                                                                                                             | 2.30 – 19.04                                                                                                                        | 2.13- 19.72                                                                                                                          | 2.32- 22.31                                                                                                                          |
| Index ranges                                         | -9 ≤ <i>h</i> ≤ 9<br>-22 ≤ <i>k</i> ≤ 22<br>-26 ≤ <i>l</i> ≤ -26                                                                       | -9 ≤ <i>h</i> ≤ 9<br>-22 ≤ <i>k</i> ≤ 22<br>-26 ≤ <i>l</i> ≤ 26                                                                     | -9 ≤ <i>h</i> ≤ 9<br>-22 ≤ <i>k</i> ≤ 22<br>-26 ≤ <i>l</i> ≤ 26                                                                      | -9 ≤ <i>h</i> ≤ 9<br>-22 ≤ <i>k</i> ≤ 22<br>-26 ≤ <i>l</i> ≤ 26                                                                      |
| Reflections collected                                | 32943                                                                                                                                  | 31761                                                                                                                               | 31700                                                                                                                                | 31686                                                                                                                                |
| Independent reflections ( <i>R</i> <sub>int.</sub> ) | 6092 (0.0760)                                                                                                                          | 6045 ( 0.1110 )                                                                                                                     | 6020(0.0976)                                                                                                                         | 6001(0.0831)                                                                                                                         |
| Max./min. Transmission                               | 0.258 /0.172                                                                                                                           | 0.620/0.493                                                                                                                         | 0.371 / 0.279                                                                                                                        | 0.358/0.447                                                                                                                          |
| Data/restraints/parameters                           | 6092 /0/402                                                                                                                            | 6045 /0/ 402                                                                                                                        | 6020 /0/ 402                                                                                                                         | 6001/0/402                                                                                                                           |
| Goodness-of-fit on <i>F</i> <sup>2</sup>             | 1.275                                                                                                                                  | 1.179                                                                                                                               | 1.189                                                                                                                                | 1.156                                                                                                                                |
| Final <i>R</i> indices [ <i>I</i> > 2σ( <i>I</i> )]  | <i>R</i> <sub>1</sub> = 0.0827<br><i>wR</i> <sub>2</sub> = 0.1363                                                                      | <i>R</i> <sub>1</sub> = 0.0818<br><i>wR</i> <sub>2</sub> = 0.1168                                                                   | <i>R</i> <sub>1</sub> = 0.1025<br><i>wR</i> <sub>2</sub> = 0.1922                                                                    | <i>R</i> <sub>1</sub> = 0.0617<br><i>wR</i> <sub>2</sub> = 0.1103                                                                    |
| <i>R</i> indices (all data)                          | <i>R</i> <sub>1</sub> = 0.0668,<br><i>wR</i> <sub>2</sub> = 0.1303                                                                     | <i>R</i> <sub>1</sub> = 0.0818<br><i>wR</i> <sub>2</sub> = 0.1111                                                                   | <i>R</i> <sub>1</sub> = 0.0761<br><i>wR</i> <sub>2</sub> = 0.1824                                                                    | <i>R</i> <sub>1</sub> = 0.0503<br><i>wR</i> <sub>2</sub> = 0.1062                                                                    |
| Largest diff. peak/hole [e.Å <sup>-3</sup> ]         | 1.267/-2.079                                                                                                                           | 1.461 /-2.610                                                                                                                       | 3.712/-1.739                                                                                                                         | 1.681/-2.228                                                                                                                         |

**Table S2. Bond Lengths and Bond Angles of Complexes 1-4**

| Complex   | Bond length [Å]     | Bond angle [°]          |
|-----------|---------------------|-------------------------|
| <b>1</b>  | Ir1— Se1 2.4663(12) | Se1— Ir1— Se2 95.99(4)  |
|           | Ir1— Se2 2.5159(12) | Cl1— Ir1— Se2 90.79(8)  |
|           | Ir1— Cl1 2.439(3)   | Cl1— Ir1— Se1 78.31(8)  |
|           | Se2— C14 1.840(11)  | C6— Se1— Ir1 113.8(3)   |
|           | Se1— C6 1.939(11)   | C7— Se1— Ir1 102.1(3)   |
|           | Se1— C7 1.973(10)   | C14— Se2— Ir1 105.6(3)  |
|           | C14— N1 1.369(13)   | C14— N2— C15 123.4(9)   |
|           | C14— N2 1.352(13)   | C14— N1— C7 123.2(9)    |
|           | N1— C8 1.393(13)    | N1— C7— Se1 111.9(7)    |
|           |                     | N2— C15— C16 113.3(8)   |
|           |                     | C(6)—Se(1)—C(7) 96.6(5) |
|           |                     |                         |
|           |                     |                         |
|           |                     |                         |
| <b>2.</b> | Ir1— Se1 2.4663(13) | S1— Ir1— Se1 95.41(7)   |
|           | Ir1— S1 2.417(2)    | Cl1— Ir1— S1 90.69(10)  |
|           | Cl1— Ir1 2.436(3)   | Cl1— Ir1— Se1 78.08(7)  |
|           | C14— S1 1.692(10)   | C6— Se1— Ir1 113.3(3)   |
|           | C14— N2 1.365(11)   | C7— Se1— Ir1 100.7(3)   |
|           | C6— Se1 1.945(10)   | C14— S1— Ir1 108.9(3)   |
|           | C7— Se1 1.945(10)   | C14— N2— C15 124.2(8)   |
|           | C8— N1 1.365(11)    | C14— N1— C7 122.7(8)    |
|           | C14— N1 1.363(11)   | N1— C7— Se1 122.7(8)    |
|           |                     | C16— C15— N2 113.6(8)   |
|           | C6—Se1—C7 95.4(4)   |                         |
| <b>3</b>  | Ir1— S1 2.355(4)    | S1— Ir1— Se1 94.99(9)   |
|           | Ir1— Se1 2.5141(16) | Cl1— Ir1— Se1 90.85(12) |
|           | Cl1— Ir1 2.427(4)   | Cl1— Ir1— S1 79.62(14)  |
|           | C14— Se1 1.844(15)  | C6— S1— Ir1 116.2(5)    |
|           | C14— N2 1.344(18)   | C7— S1— Ir1 106.5(5)    |
|           | C6— S1 1.777(15)    | C14— Se1— Ir1 104.8(4)  |
|           | C7— S1 1.823(15)    | C14— N2— C15 125.6(12)  |
|           | C8— N1 1.386(17)    | C14— N1— C7 123.2(12)   |
|           | C14— N1 1.351(17)   | N1— C7— S1 111.9(9)     |
|           |                     | C16— C15— N2 112.2(12)  |
|           |                     | C6—S1—C7 98.6(7)        |

|          |        |            |            |          |
|----------|--------|------------|------------|----------|
| <b>4</b> | Ir1—S1 | 2.3469(18) | S1—Ir1—S2  | 94.61(6) |
|          | Ir1—S2 | 2.4146(19) | S1—Ir1—Cl1 | 79.33(7) |
|          | N1—C14 | 1.364(9)   | S2—Ir1—Cl1 | 90.55(8) |
|          | N1—C8  | 1.392(9)   | C6—S1—Ir1  | 116.0(3) |
|          | C14—N2 | 1.346(8)   | C7—S1—Ir1  | 104.4(3) |
|          | S2—C14 | 1.685(7)   | C14—S2—Ir1 | 108.0(2) |
|          | S1—C6  | 1.782(8)   | C14—N1—C7  | 123.2(6) |
|          | S1—C7  | 1.834(7)   | C14—N2—C15 | 124.0(6) |
|          |        |            | N1—C7—S1   | 112.3(5) |
|          |        |            | N2—C15—C16 | 113.4(6) |
|          |        |            | C6—S1—C7   | 98.9(3)  |

**Table S3. Non-covalent Interactions C–H···F Distances (Å) of Complexes 1-4**

| <b>Complex 1</b> |       | <b>Complex 2</b> |       | <b>Complex 3</b> |       | <b>Complex 4</b> |       |
|------------------|-------|------------------|-------|------------------|-------|------------------|-------|
| H30C-F4          | 2.453 | H7B-F2           | 2.486 | H9-F5            | 2.580 | H28B-F2          | 2.632 |
| H27A-F3          | 2.531 | H30B-F5          | 2.581 | H7B-F3           | 2.489 | H9-F6            | 2.606 |
| H15A-F3          | 2.606 | H15b-F3          | 2.619 | H15A-F1          | 2.546 | H7B-F6           | 2.501 |
| H7B-F2           | 2.530 | H28B-F3          | 2.541 | H28C-F6          | 2.612 | H2-F5            | 2.668 |
| H7B-F1           | 2.480 | H12-Cl1          | 2.883 | H7B-F3           | 2.489 | H12-Cl1          | 2.865 |
|                  |       |                  |       | H12-Cl1          | 2.829 |                  |       |

### Secondary Interaction-

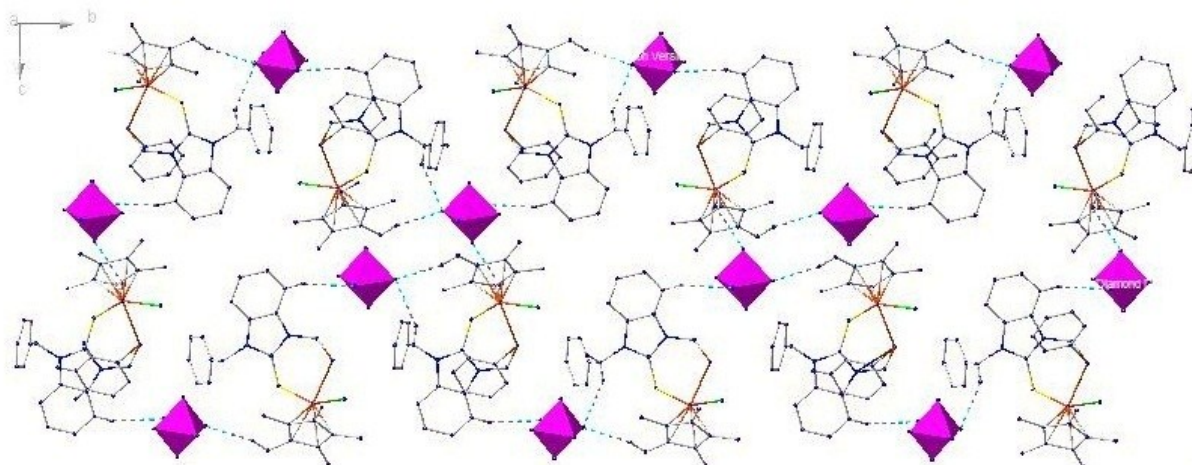

**Figure S1** Three dimensional packing framework showing non-covalent C–H···F interactions in the crystal lattice contain PF<sub>6</sub> in polyhedral form of **2**

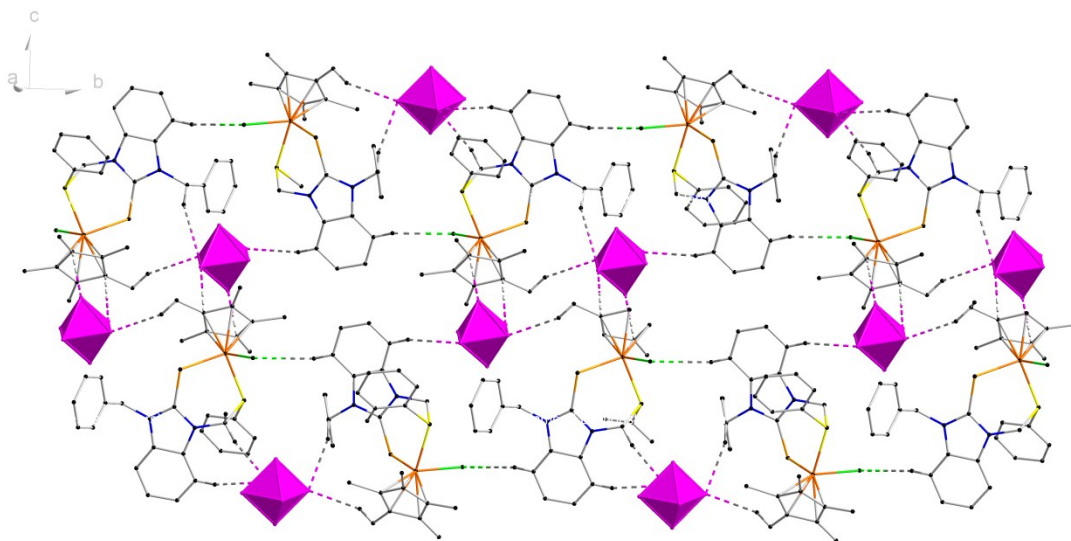

**Figure S2** Three dimensional packing framework showing non-covalent C–H···F interactions in the crystal lattice contain  $\text{PF}_6$  in polyhedral form of **3**

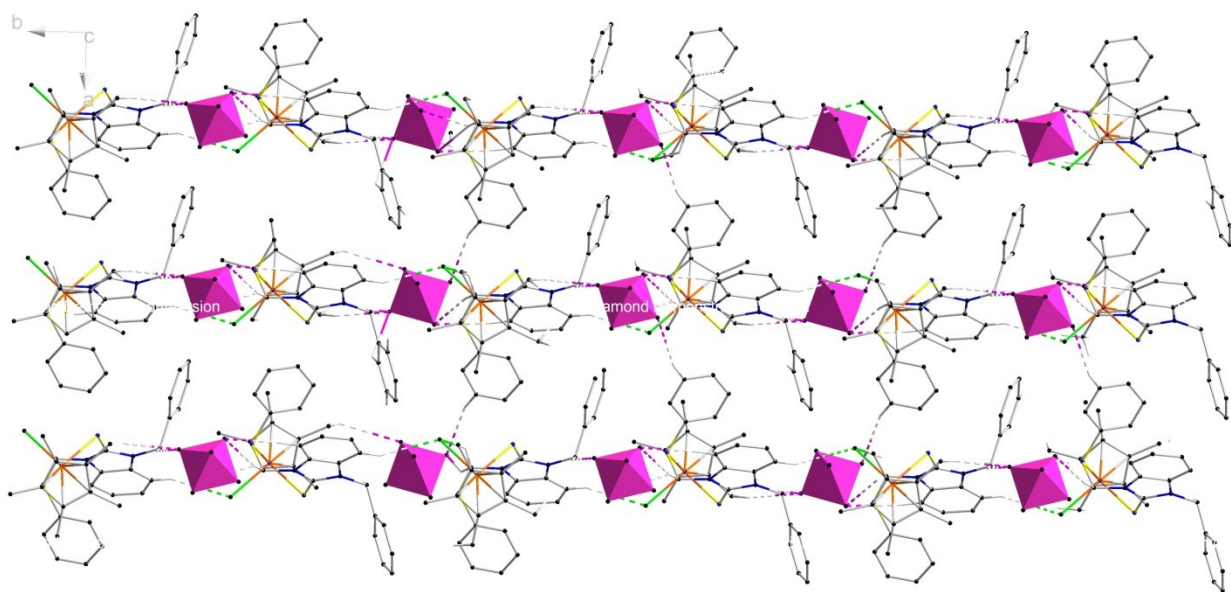

**Figure S3** Three dimensional packing framework showing non-covalent C–H···F interactions in the crystal lattice contain  $\text{PF}_6$  in polyhedral form of **4**

## Mass Spectrum-

### Mass Spectrum SmartFormula Report

|                      |                            |                   |                       |
|----------------------|----------------------------|-------------------|-----------------------|
| <b>Analysis Info</b> |                            | Acquisition Date  | 3/30/2016 11:23:18 AM |
| Analysis Name        | D:\Data\MAR 2016\laks A2.d | Operator          | IITD                  |
| Method               | tune_wide.m                | Instrument / Ser# | micrOTOF-Q II 10262   |
| Sample Name          | TM1:100                    | Comment           |                       |

|                              |          |                       |           |                  |           |
|------------------------------|----------|-----------------------|-----------|------------------|-----------|
| <b>Acquisition Parameter</b> |          |                       |           |                  |           |
| Source Type                  | ESI      | Ion Polarity          | Positive  | Set Nebulizer    | 0.3 Bar   |
| Focus                        | Active   | Set Capillary         | 4500 V    | Set Dry Heater   | 180 °C    |
| Scan Begin                   | 50 m/z   | Set End Plate Offset  | -500 V    | Set Dry Gas      | 4.0 l/min |
| Scan End                     | 3000 m/z | Set Collision Cell RF | 500.0 Vpp | Set Divert Valve | Source    |

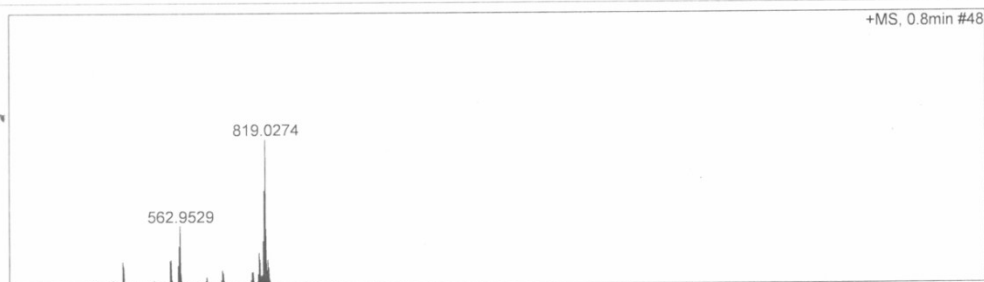

| Meas. m/z | # | Formula                                                            | m/z      | err [ppm] | Mean err [ppm] | rdb  | N-Rule | e <sup>-</sup> Conf | mSigma | Std I |
|-----------|---|--------------------------------------------------------------------|----------|-----------|----------------|------|--------|---------------------|--------|-------|-------|-------|-------|-------|-------|-------|
| 821.0276  | 1 | C <sub>31</sub> H <sub>33</sub> ClIrN <sub>2</sub> Se <sub>2</sub> | 821.0281 | 0.6       | -0.8           | 16.5 | ok     | even                | 28.3   | 25.1  | 4.9   | 7.3   | 3.7   | 842.7 |       |       |

Fig S4 Mass spectrum of complex 1

### Mass Spectrum SmartFormula Report

|                      |                    |                  |                            |
|----------------------|--------------------|------------------|----------------------------|
| <b>Analysis Info</b> |                    | Acquisition Date | 8/5/2014 10:12:34 AM       |
| Analysis Name        | Z:\Aug_2014\ALP1.d | Operator         | Sharma/Singh               |
| Method               | tune_wide.m        | Instrument       | micrOTOF-Q II 228888.10262 |
| Sample Name          | TM1:100            | Comment          |                            |

|                              |          |                       |           |                  |           |
|------------------------------|----------|-----------------------|-----------|------------------|-----------|
| <b>Acquisition Parameter</b> |          |                       |           |                  |           |
| Source Type                  | ESI      | Ion Polarity          | Positive  | Set Nebulizer    | 0.3 Bar   |
| Focus                        | Active   | Set Capillary         | 4500 V    | Set Dry Heater   | 180 °C    |
| Scan Begin                   | 50 m/z   | Set End Plate Offset  | -500 V    | Set Dry Gas      | 4.0 l/min |
| Scan End                     | 3000 m/z | Set Collision Cell RF | 600.0 Vpp | Set Divert Valve | Source    |

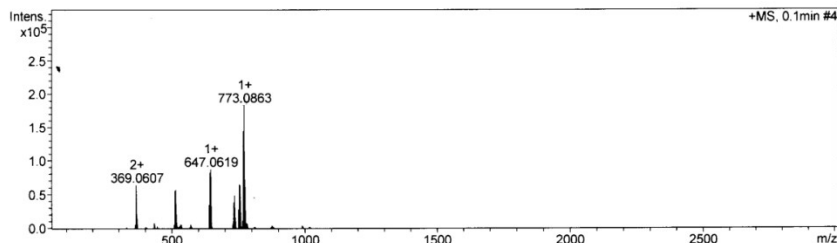

| Meas. m/z  | # Ion | Formula                                               | m/z        | err [ppm] | Mean err [ppm] | rdb  | N-Rule | e <sup>-</sup> Conf | mSigma | Std I |
|------------|-------|-------------------------------------------------------|------------|-----------|----------------|------|--------|---------------------|--------|-------|-------|-------|-------|-------|-------|
| 773.086288 | 1     | C <sub>31</sub> H <sub>33</sub> ClIrN <sub>2</sub> Se | 773.083333 | -3.8      | -1.9           | 16.5 | ok     | even                | 28.6   | 24.7  | 2.2   | 4.2   | 2.2   | 842.7 |       |

Fig S5 Mass spectrum of complex 2

## Mass Spectrum SmartFormula Report

**Analysis Info**  
 Analysis Name: D:\Data\Aug\_2014\ALP2.d  
 Method: tune\_wide.m  
 Sample Name: TM1:100  
 Comment:  
 Acquisition Date: 8/5/2014 11:34:19 AM  
 Operator: Sharma/Singh  
 Instrument / Ser#: micrOTOF-Q II 10262

**Acquisition Parameter**  
 Source Type: ESI      Ion Polarity: Positive      Set Nebulizer: 0.3 Bar  
 Focus: Active      Set Capillary: 4500 V      Set Dry Heater: 180 °C  
 Scan Begin: 50 m/z      Set End Plate Offset: -500 V      Set Dry Gas: 4.0 l/min  
 Scan End: 3000 m/z      Set Collision Cell RF: 600.0 Vpp      Set Divert Valve: Source

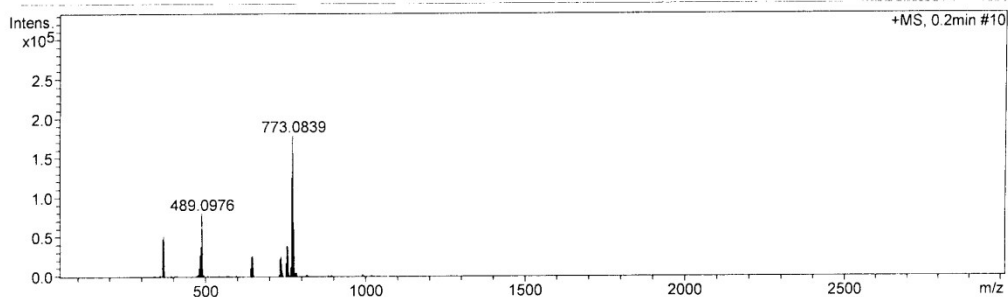

| Meas. m/z | # | Formula                                                              | m/z      | err [ppm] | Me an err [ppm] | rdb  | N-R | e <sup>-</sup> Conf | mSigma | Std l | St d | St d l | St d m/ | Std Com b |
|-----------|---|----------------------------------------------------------------------|----------|-----------|-----------------|------|-----|---------------------|--------|-------|------|--------|---------|-----------|
| 773.0839  | 1 | C <sub>31</sub> H <sub>33</sub> ClIrN <sub>2</sub> S <sub>2</sub> Se | 773.0833 | -0.8      | 0.6             | 16.5 | ok  | even                | 46.0   | 35.2  | 1.9  | 5.6    | 2.7     | 842.7     |

**Fig S6** Mass spectrum of complex 3

## Mass Spectrum SmartFormula Report

**Analysis Info**  
 Analysis Name: Z:\SEPT\_2014\ALP1.d  
 Method: tune\_low.m  
 Sample Name: Lactamase digest  
 Comment:  
 Acquisition Date: 9/5/2014 10:57:57 AM  
 Operator: Sharma/Singh  
 Instrument: micrOTOF-Q II 228888.10262

**Acquisition Parameter**  
 Source Type: ESI      Ion Polarity: Positive      Set Nebulizer: 0.3 Bar  
 Focus: Active      Set Capillary: 4500 V      Set Dry Heater: 190 °C  
 Scan Begin: 50 m/z      Set End Plate Offset: -500 V      Set Dry Gas: 4.0 l/min  
 Scan End: 1500 m/z      Set Collision Cell RF: 100.0 Vpp      Set Divert Valve: Source

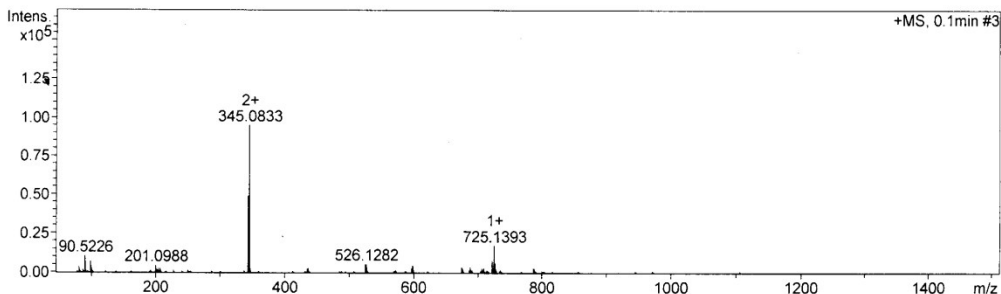

| Meas. m/z  | # | Ion Formula                                                       | Score  | m/z        | err [ppm] | Mean err [ppm] | mSigma | rdb  | e <sup>-</sup> Conf | N-Rule |
|------------|---|-------------------------------------------------------------------|--------|------------|-----------|----------------|--------|------|---------------------|--------|
| 725.139260 | 1 | C <sub>31</sub> H <sub>33</sub> ClIrN <sub>2</sub> S <sub>2</sub> | 100.00 | 725.138804 | -0.6      | 0.6            | 18.2   | 16.5 | even                | ok     |

**Fig S7** Mass spectrum of complex 4



## NMR Spectra-

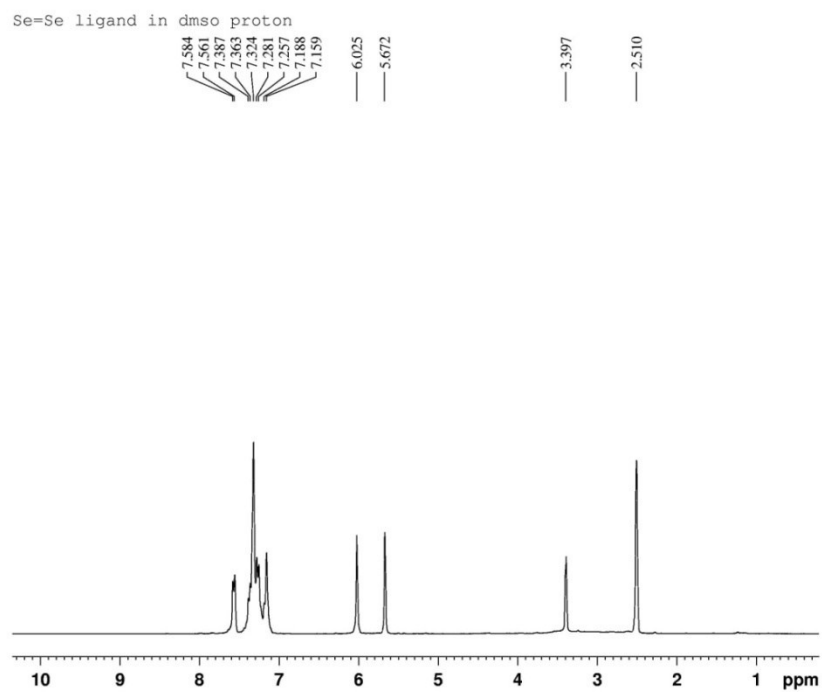

**FigureS8**  $^1\text{H}$  NMR spectrum of ligand L1

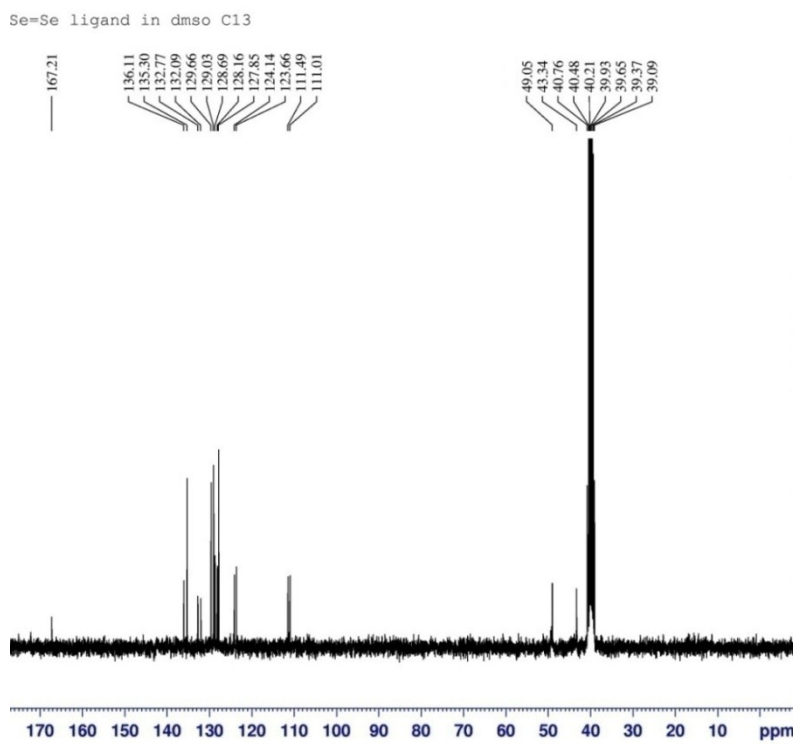

**FigureS9**  $^{13}\text{C}\{^1\text{H}\}$  NMR spectrum of ligand L1

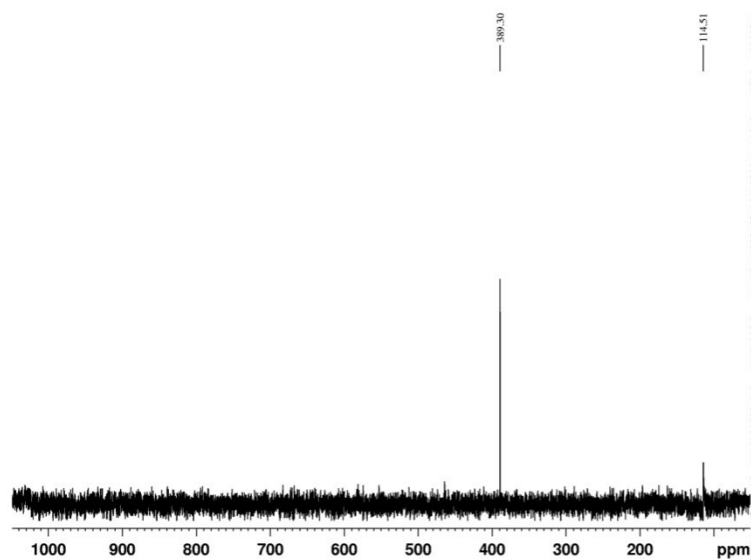

**FigureS10** <sup>77</sup>Se{<sup>1</sup>H} NMR spectrum of ligand L1

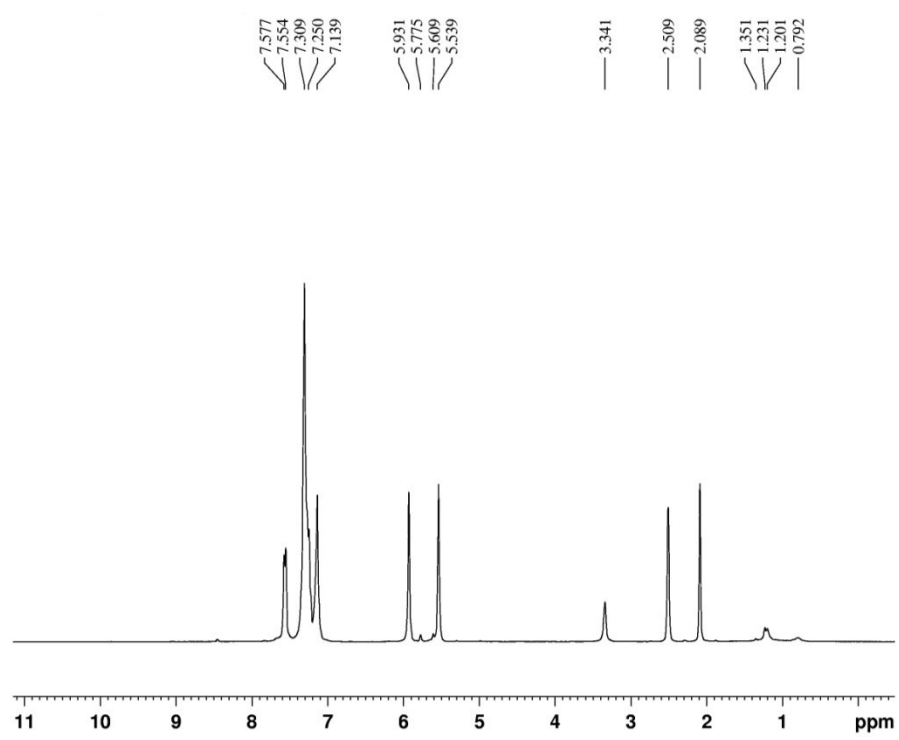

**FigureS11** <sup>1</sup>H NMR spectrum of ligand L2

Se=S ligand in dmso C13

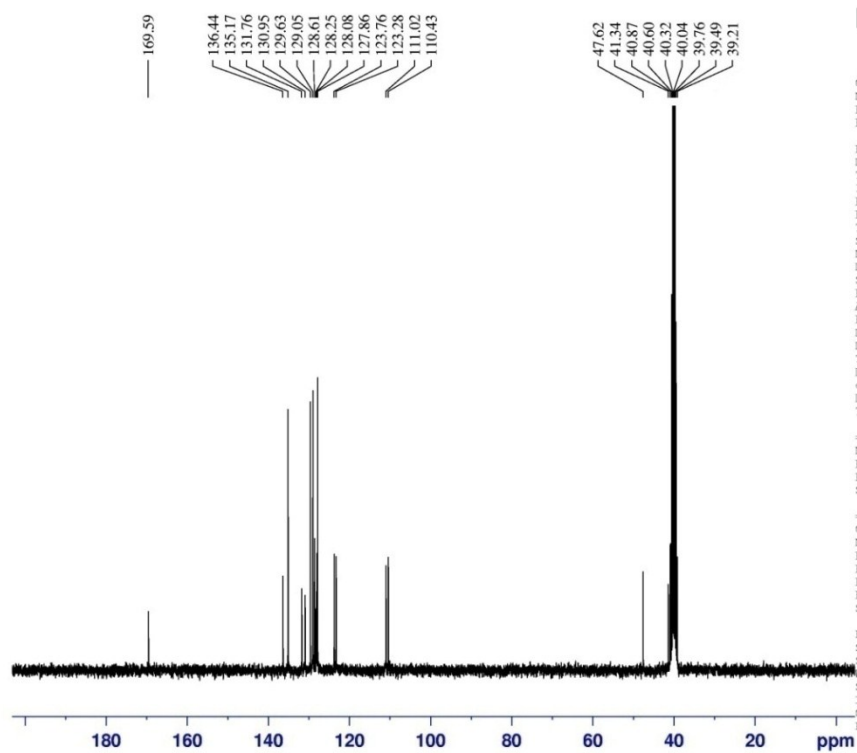

FigureS12  $^{13}\text{C}\{^1\text{H}\}$  NMR spectrum of ligand L2

Se=S ligand in dmso Se77

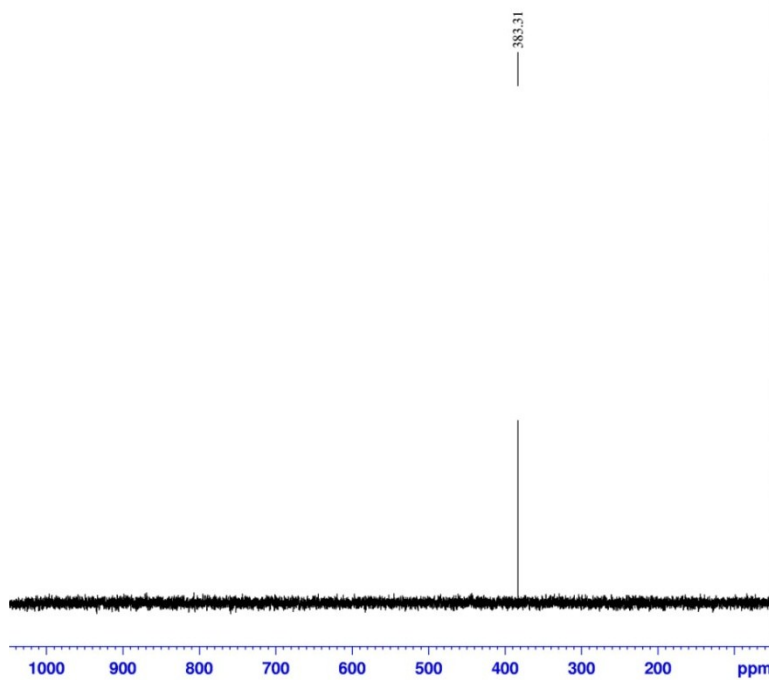

FigureS13  $^{77}\text{Se}\{^1\text{H}\}$  NMR spectrum of ligand L2

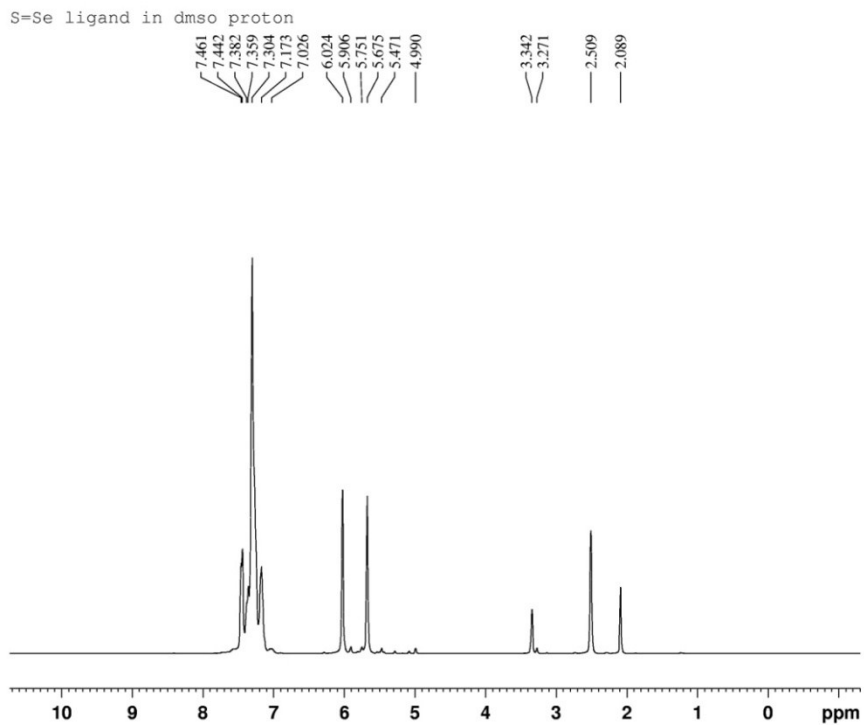

**FigureS14**  $^1\text{H}$  NMR spectrum of ligand L3

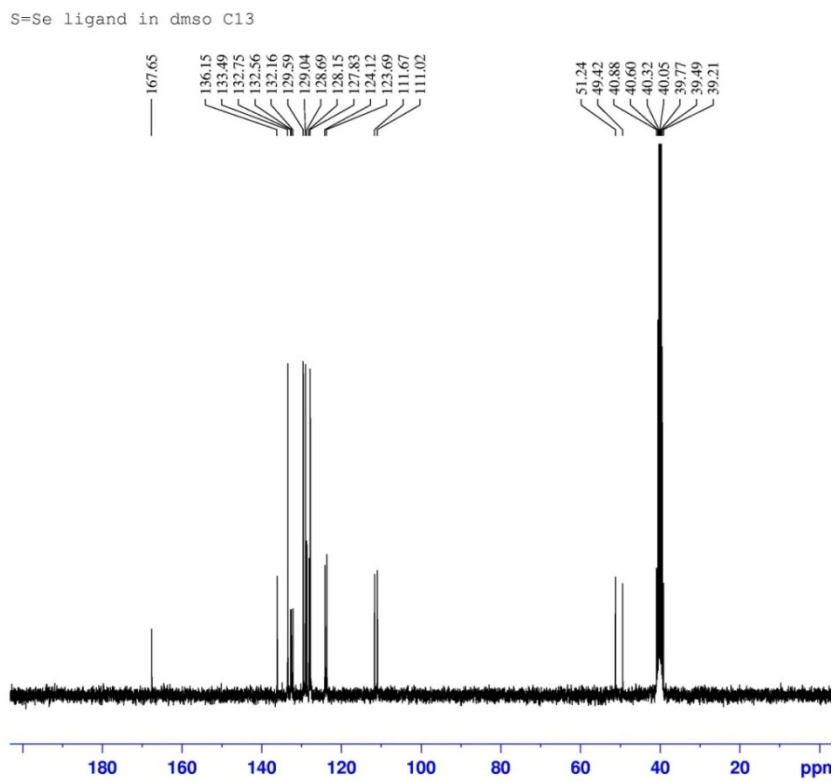

**FigureS15**  $^{13}\text{C}\{^1\text{H}\}$  NMR spectrum of ligand L3

S=Se ligand in dmso se77

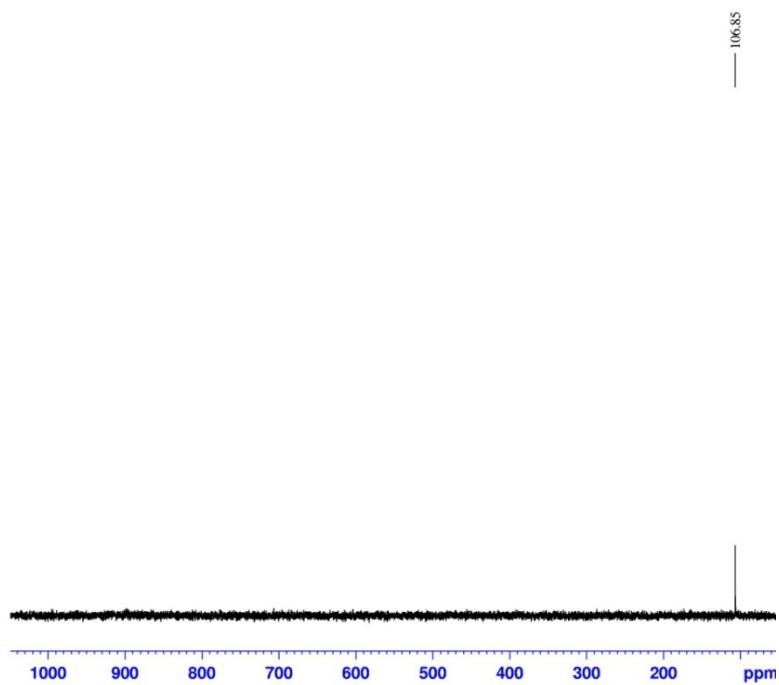

**FigureS16**  $^{77}\text{Se}\{^1\text{H}\}$  NMR spectrum of ligand **L3**

S=S ligand in dmso proton

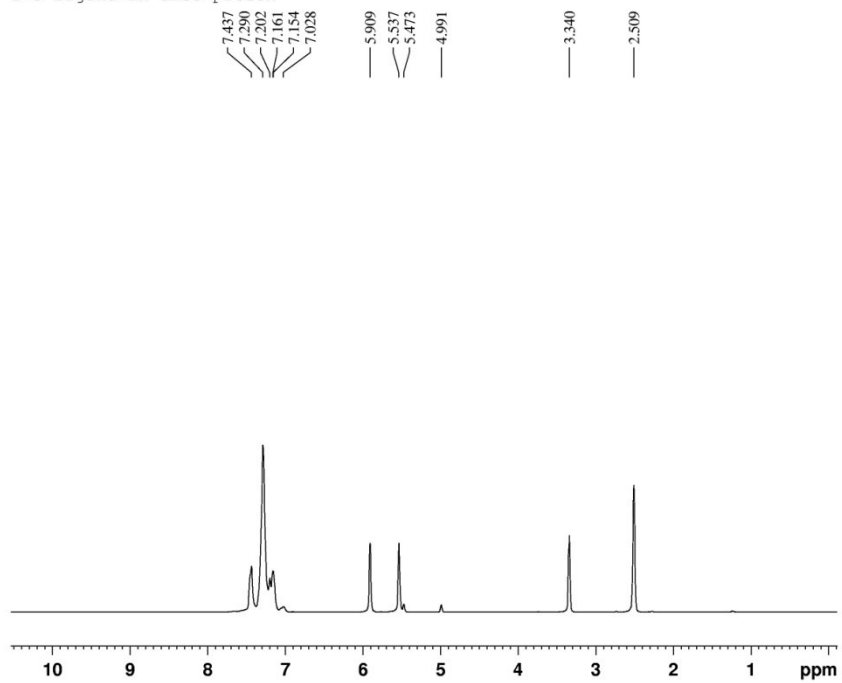

**FigureS17**  $^1\text{H}$  NMR spectrum of ligand **L4**

S=S ligand in dmsO C13

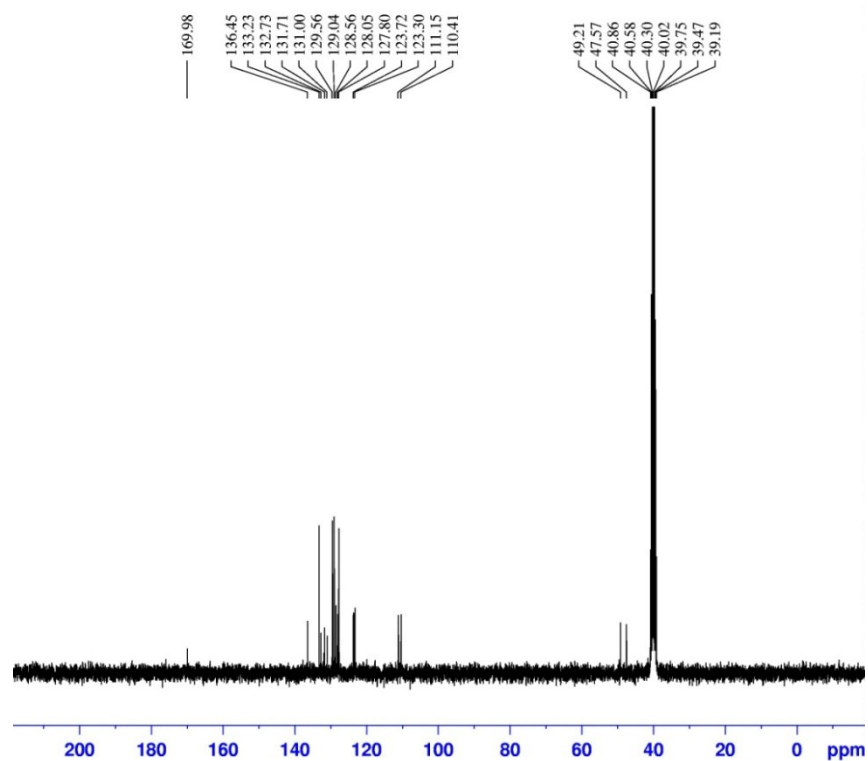

FigureS18  $^{13}\text{C}\{^1\text{H}\}$  NMR spectrum of ligand L4

Ir, Se, =Se proton nmr

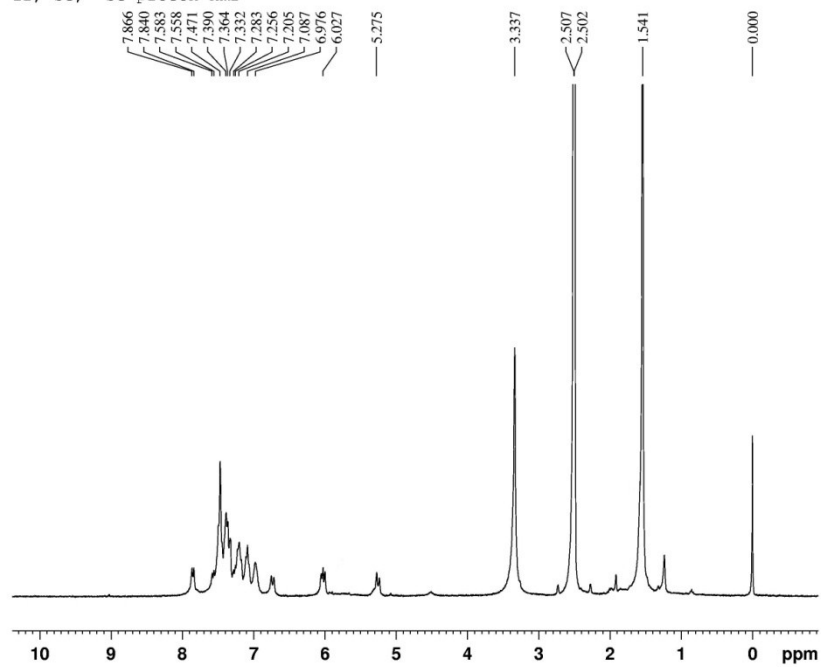

FigureS19  $^1\text{H}$  NMR spectrum of complex 1

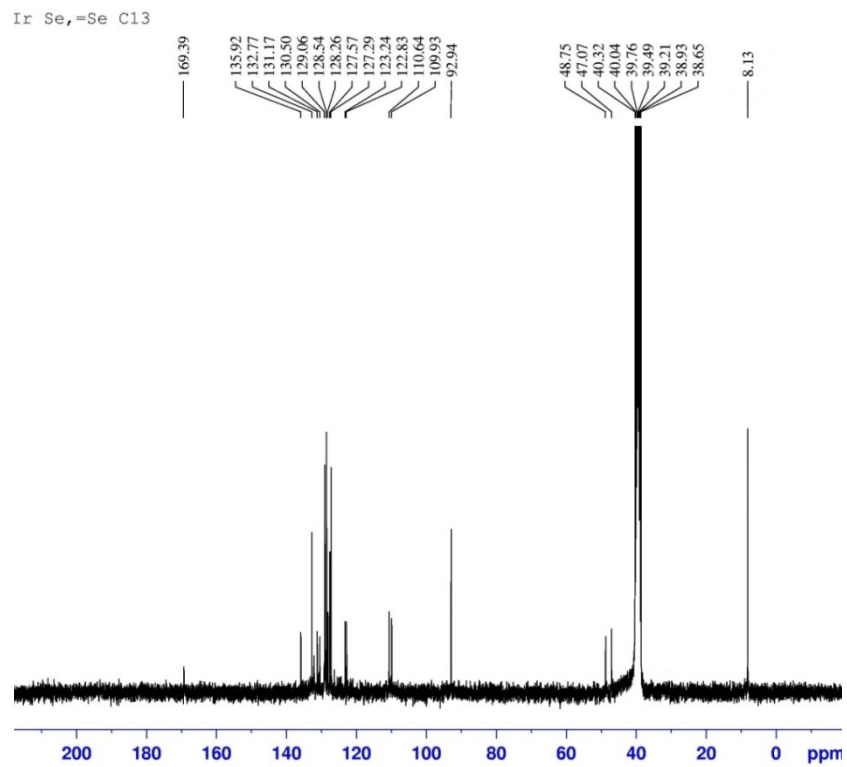

FigureS20  $^{13}\text{C}\{^1\text{H}\}$  NMR spectrum of complex 1

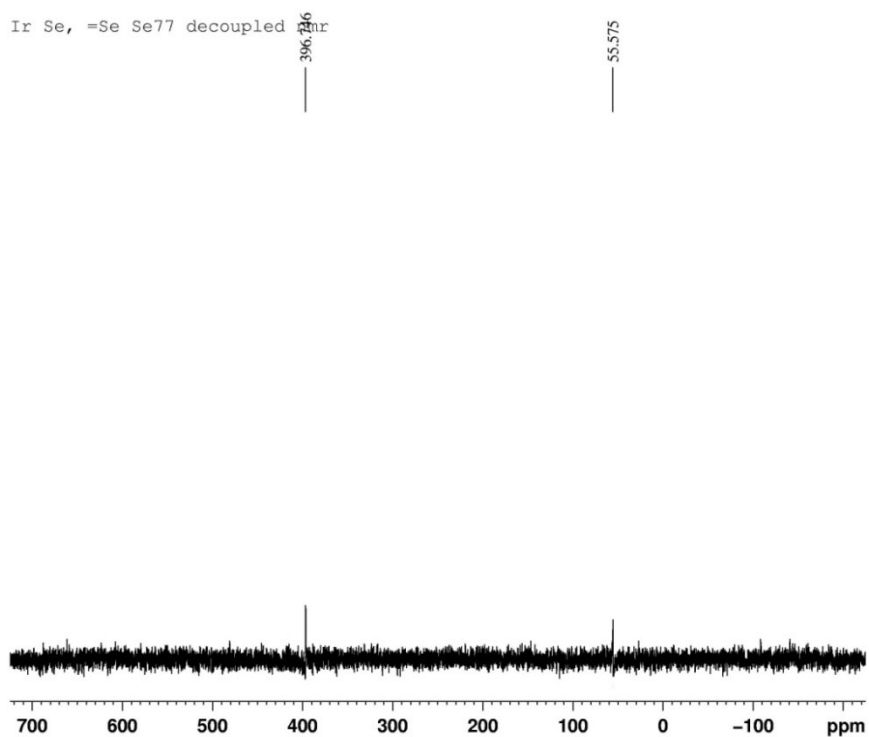

FigureS21  $^{77}\text{Se}\{^1\text{H}\}$  NMR spectrum of complex 1

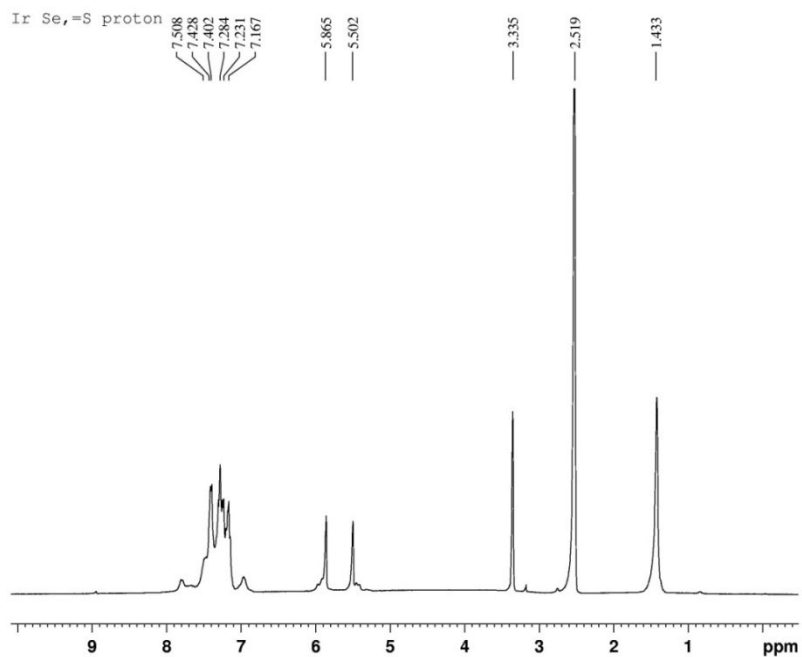

**FigureS22**  $^1\text{H}$  NMR spectrum of complex 2

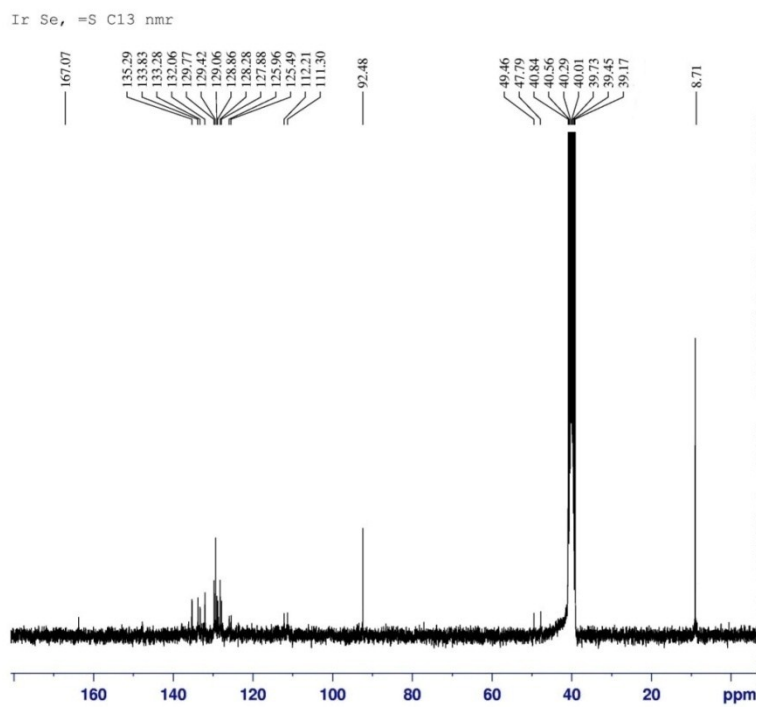

**FigureS23**  $^{13}\text{C}\{^1\text{H}\}$  NMR spectrum of complex 2



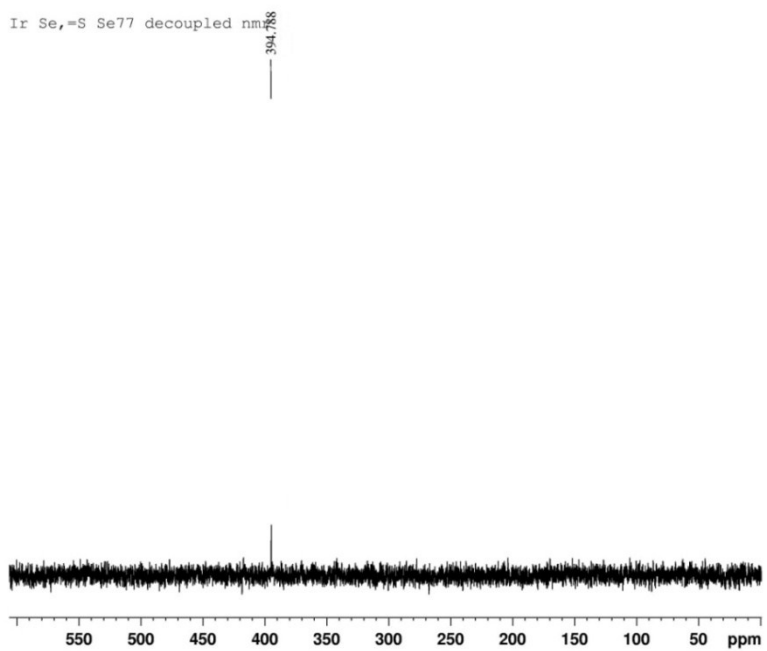

**FigureS24**  $^{77}\text{Se}\{^1\text{H}\}$  NMR spectrum of complex 2

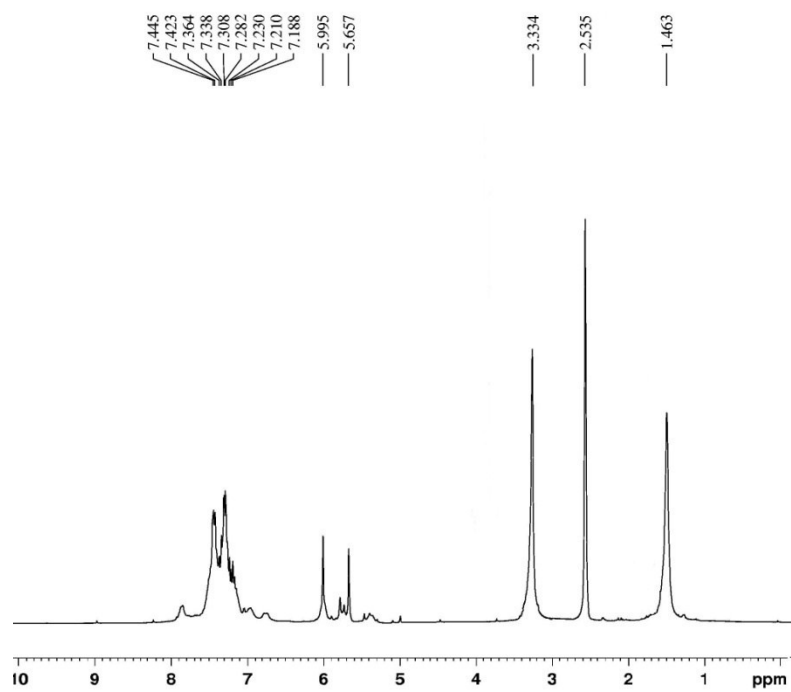

**FigureS25**  $^1\text{H}$  NMR spectrum of complex 3

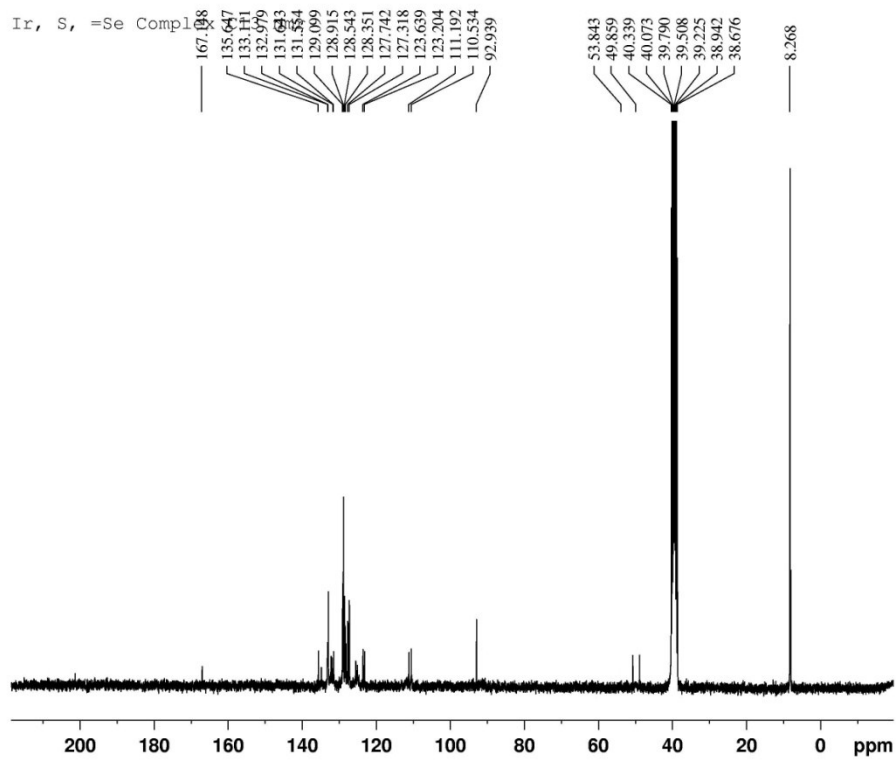

FigureS26  $^{13}\text{C}\{^1\text{H}\}$  NMR spectrum of complex 3

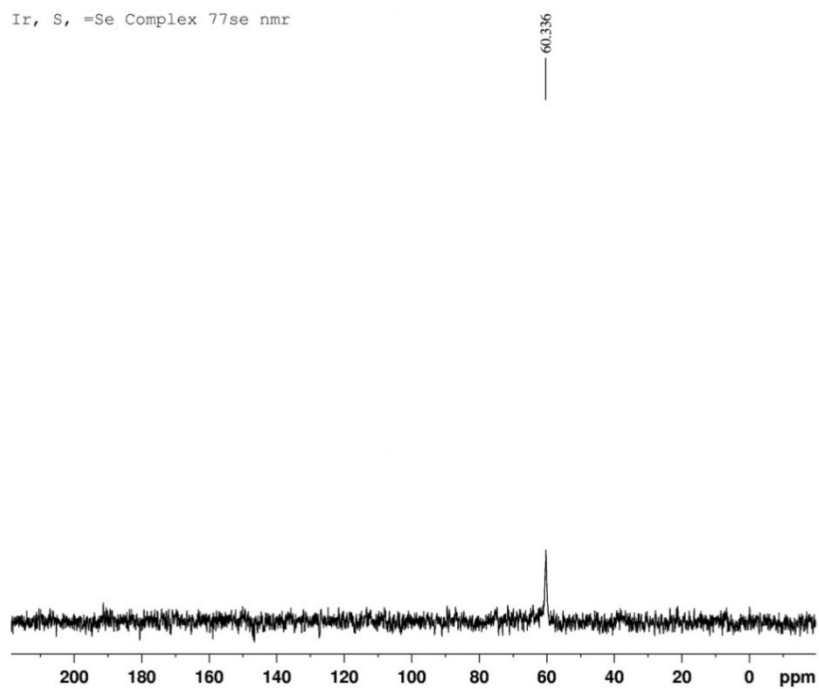

FigureS27  $^{77}\text{Se}\{^1\text{H}\}$  NMR spectrum of complex 3

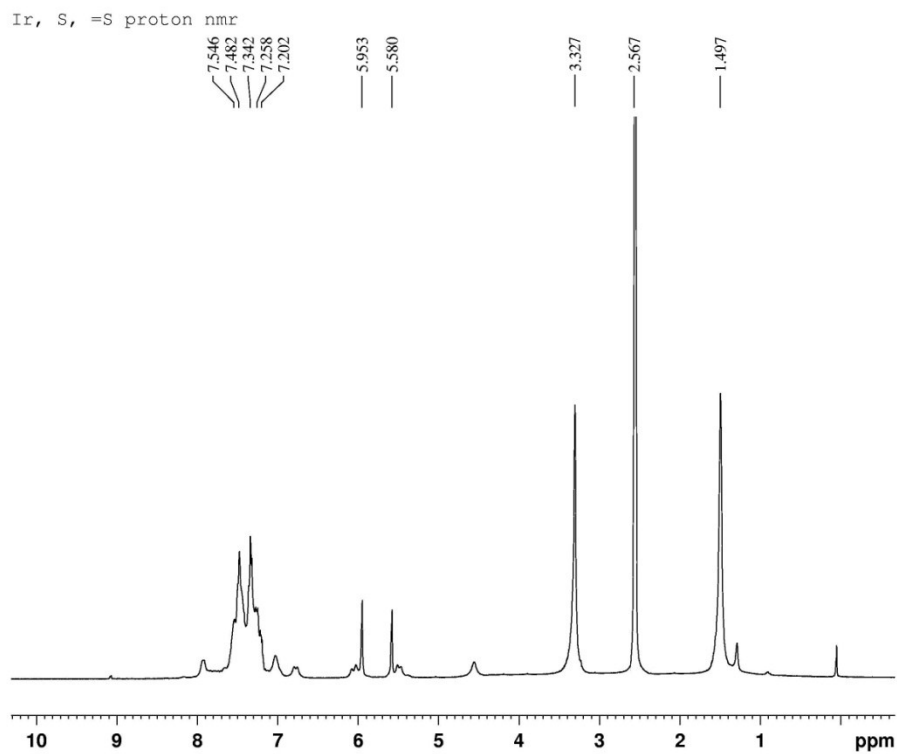

FigureS28  $^1\text{H}$  NMR spectrum of complex 4

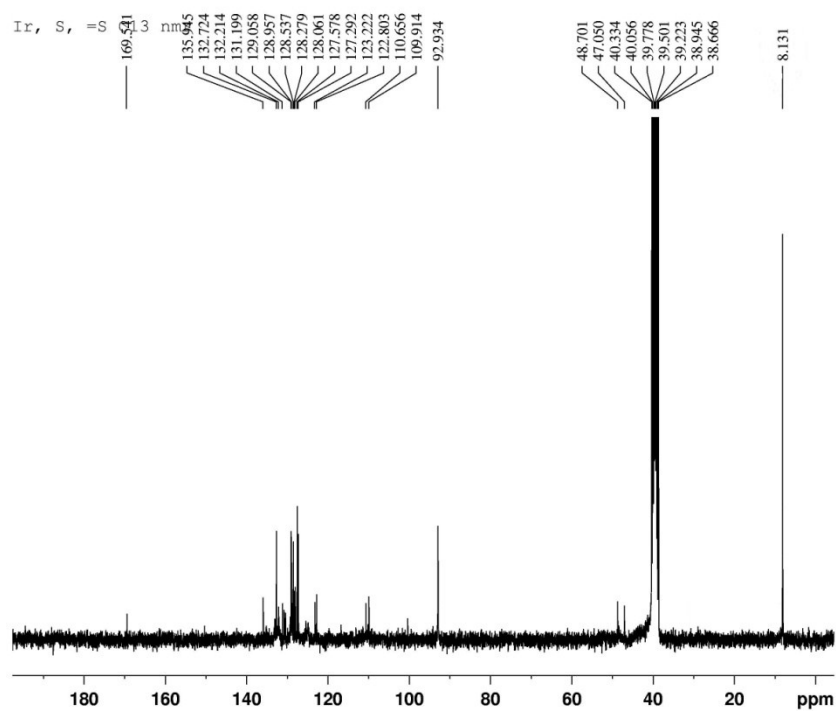

FigureS29  $^{13}\text{C}\{^1\text{H}\}$  NMR spectrum of complex 4

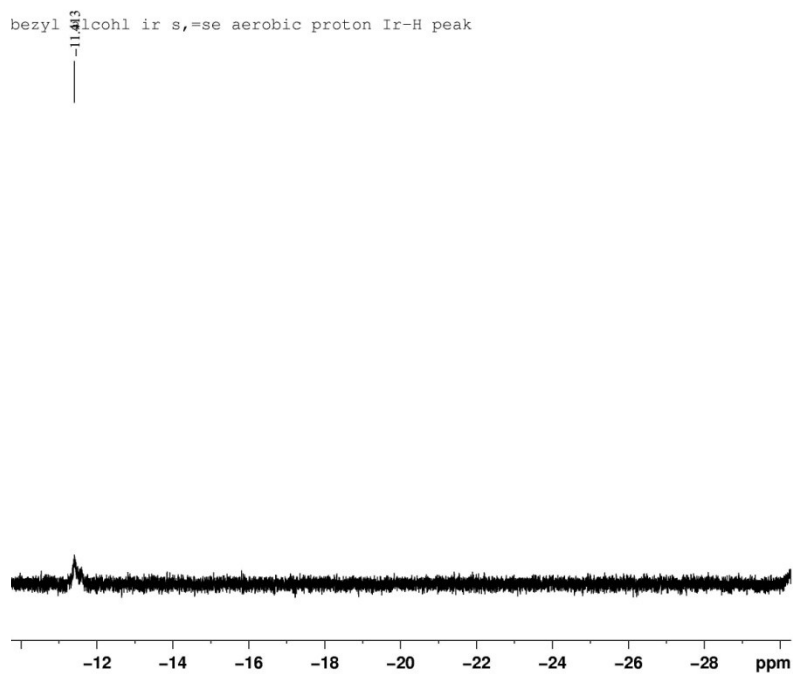

**FigureS30**  $^1\text{H}$  NMR spectrum for Ir-H species

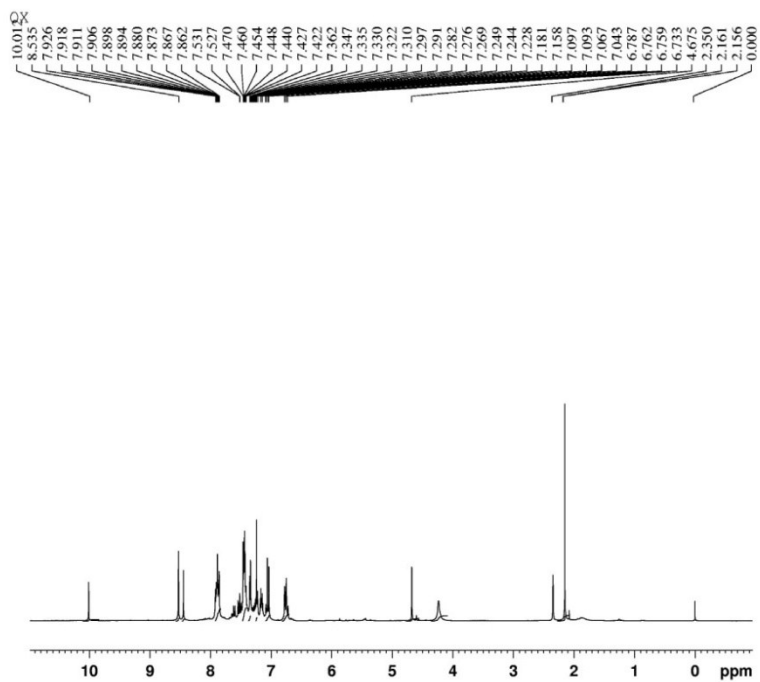

**FigureS31**  $^1\text{H}$  NMR spectrum after 30 min of catalysis reaction progress (1,2-phenylenediamine and benzyl alcohol)

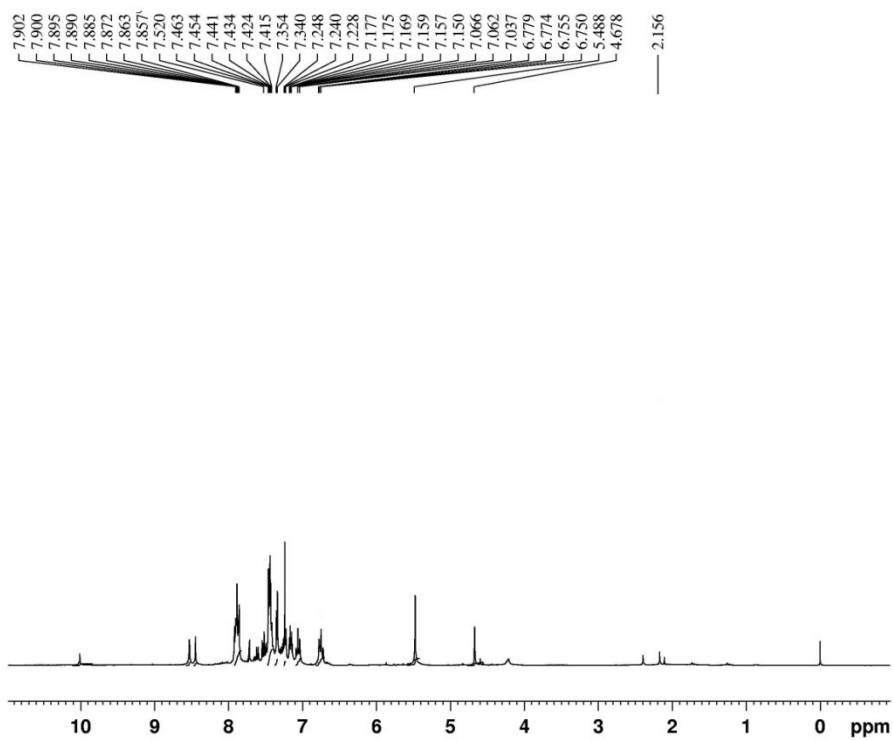

**FigureS32**  $^1\text{H}$  NMR spectrum after 90 min of catalysis reaction progress 1,2-phenylenediamine and benzyl alcohol

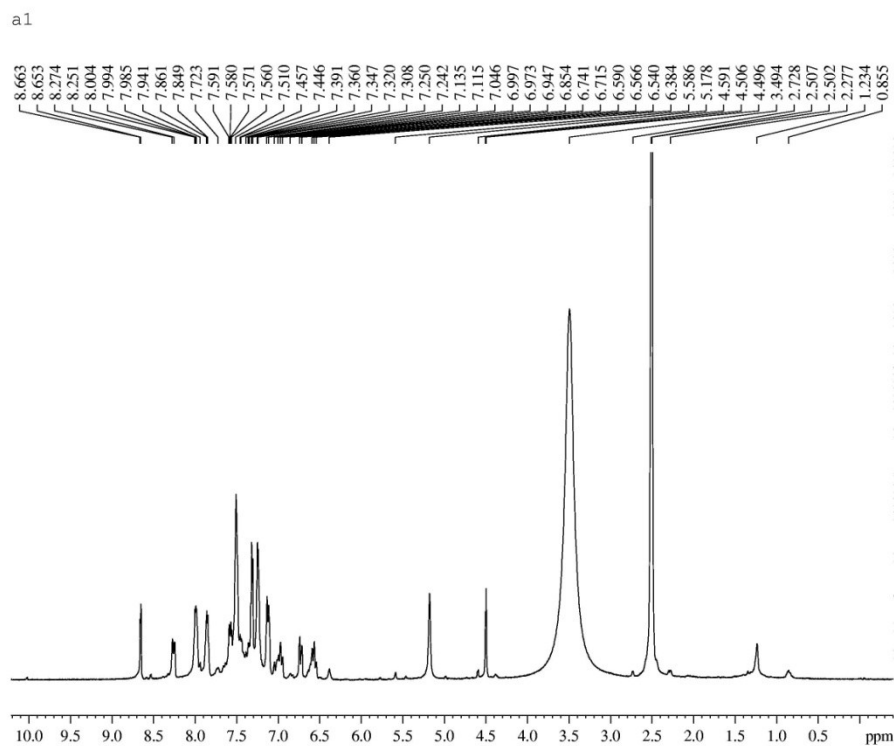

**FigureS33**  $^1\text{H}$  NMR spectrum of catalytic reaction mixture

## NMR Spectra of compound (3a-3g)-

**1-Benzyl-2-phenyl-1H-benzimidazole (3a)**<sup>1,3</sup>- White solid; <sup>1</sup>H NMR (CDCl<sub>3</sub>, 25°C vs Me<sub>4</sub>Si):  $\delta$  (ppm): 7.87 (d, J = 6.1 Hz, 1H), 7.70–7.68 (m, 2H), 7.47–7.41 (m, 3H), 7.34–7.30 (m, 4H), 7.25–7.20 (m, 2H), 7.12–7.10 (m, 2H), 5.47 (s, 2H).

**1-(4-Methylbenzyl)-2-(4-methylphenyl)-1H-benzimidazole (3b)**<sup>1,2</sup>- White solid; <sup>1</sup>H NMR (CDCl<sub>3</sub>, 25°C vs Me<sub>4</sub>Si):  $\delta$  (ppm) 7.83 (d, J = 6.4 Hz, 1H), 7.60 (d, J = 6.2 Hz, 2H), 7.32–7.20 (m, 5H), 7.13 (d, J = 6.2 Hz, 2H), 6.98 (d, J = 6.1 Hz, 2H), 5.41 (s, 2H), 2.41 (s, 3H), 2.36 (s, 3H).

**1-(4-Methoxybenzyl)-2-(4-methoxyphenyl)-1H-benzimidazole (3c)**<sup>1,2</sup>- White solid; <sup>1</sup>H NMR (CDCl<sub>3</sub>, 25°C vs Me<sub>4</sub>Si):  $\delta$  (ppm) 7.67 (d, J = 6.2 Hz, 3H), 7.45 (d, J = 6.4 Hz, 1H), 7.27–7.18 (m, 2H), 7.06 (d, J = 5.2 Hz, 2H), 6.96 (d, J = 5.6 Hz, 2H), 6.85 (d, J = 6.5 Hz, 2H), 5.46 (s, 2H), 3.84 (s, 3H), 3.63 (s, 3H).

**1-(3-Methoxybenzyl)-2-(3-methoxyphenyl)-1H-benzimidazole (3d)**<sup>2</sup>- White solid; <sup>1</sup>H NMR (DMSO, 25°C vs Me<sub>4</sub>Si):  $\delta$  (ppm) 7.54 (d, J = 6.2 Hz, 1H), 7.47–7.32 (d, J = 6.8 Hz, 2H), 7.28–7.19 (m, 1H), 7.13–7.05 (m, 3H), 6.98–6.92 (d, J = 6.2 Hz, 2H), 6.82–6.72 (d, J = 6.2 Hz, 2H), 5.21 (s, 2H), 3.84 (s, 3H), 3.80 (s, 3H).

**1-(2-Methoxybenzyl)-2-(2-methoxyphenyl)-1H-benzimidazole (3e)**<sup>2</sup>- White solid; <sup>1</sup>H NMR (DMSO, 25°C vs Me<sub>4</sub>Si):  $\delta$  (ppm) 7.82 (d, J = 7.6 Hz, 1H), 7.63 (d, J = 7.2 Hz, 2H), 7.30 (d, J = 7.2 Hz, 1H), 7.24–7.22 (m, 1H), 7.19–7.17 (m, 3H), 7.11 (d, J = 6.2 Hz, 2H), 7.10 (d, J = 6.0 Hz, 2H), 5.41 (s, 2H), 2.32 (s, 3H), 2.27 (s, 3H).

**2-(Furan-2-yl)-1-(furan-2-ylmethyl)-1H-benzimidazole (3f)**<sup>1,2</sup>. White solid; <sup>1</sup>H NMR (DMSO, 25°C vs Me<sub>4</sub>Si):  $\delta$  (ppm) 7.78–7.73 (m, 1H), 7.64 (s, 1H), 7.55–7.49 (m, 1H), 7.30–7.28 (m, 3H), 7.22 (d, J = 7.4 Hz, 1H), 7.63–7.58 (m, 1H), 6.31–6.25 (m, 2H), 5.66 (s, 2H).

**1-(4-Nitrobenzyl)-2-(4-nitrophenyl)-1H-benzimidazole (3g)**<sup>2</sup>. Yellow solid; <sup>1</sup>H NMR (DMSO, 25°C vs Me<sub>4</sub>Si):  $\delta$  (ppm) 8.45–8.31 (m, 4H), 8.29 (d, J = 6.4 Hz, 2H), 8.17–8.09 (m, 1H), 7.36–7.23 (m, 2H), 7.21–7.15 (m, 1H), 7.13–7.12 (m, 1H), 6.79 (m, 1H), 6.56 (m, 1H), 5.40 (s, 2H).

## NMR Spectra of compound (5a-g, 7a-d)-

**Benzaldehyde (5a)**<sup>3</sup> - Colorless liquid; <sup>1</sup>H NMR (CDCl<sub>3</sub>, 25°C vs Me<sub>4</sub>Si) δ (ppm): 9.98 (s, 1H), δ 7.44-7.478 (m, 2H), 7.51-7.59 (m, 1H), 7.78-7.83 (m, 2H).

**4-Methylbenzaldehyde (5b)**<sup>3</sup>- Colorless liquid; <sup>1</sup>H NMR (CDCl<sub>3</sub>, 25°C vs Me<sub>4</sub>Si); δ (ppm): 2.43(s, 3H), 7.33(d, J = 6.3 Hz, 2H), 7.78 (d, J = 6.2 Hz, 2H), 9.96 (s, 1H).

**4-Methoxybenzaldehyde(5c)**<sup>3</sup>- Colorless liquid; <sup>1</sup>H NMR (CDCl<sub>3</sub>, 25°C vs Me<sub>4</sub>Si); δ (ppm): 9.82 (s, 1H), 7.82 (d, J = 6.6 Hz, 2H), 6.95 (d, J = 6.4 Hz, 2H), 3.91 (s, 3H).

**3-Methoxybenzaldehyde (5d)**<sup>3</sup>- Colorless liquid; <sup>1</sup>H NMR (CDCl<sub>3</sub>, 25°C vs Me<sub>4</sub>Si); δ (ppm): 3.82(s, 3H), 7.18(d, J = 6.2 Hz, 2H), 7.38(d, J = 6.2 Hz, 2H), 7.43(d, J = 6.8 Hz, 2H), 9.93(s, 1H).

**2-Methoxybenzaldehyde (5e)**<sup>5</sup>- Colorless liquid; <sup>1</sup>H NMR (CDCl<sub>3</sub>, 25°C vs Me<sub>4</sub>Si): δ (ppm): 3.92(s, 3H), 7.02-7.04(m, 2H), 7.53-7.58(m, 1H), 7.82-7.85(q, 1H), 10.49(s, 1H).

**2-Furaldehyde (5f)**<sup>4</sup> – Pale yellow liquid; <sup>1</sup>H NMR (CDCl<sub>3</sub>, 25°C vs Me<sub>4</sub>Si); δ (ppm): 9.65 (s, 1H), 7.69-7.67 (m, 1H), 7.52-7.44 (m, 1H), 6.60-6.59 (m, 1H).

**4-Nitrobenzaldehyde (5g)**<sup>3,4</sup>- Pale yellow solid; <sup>1</sup>H NMR (CDCl<sub>3</sub>, 25°C vs Me<sub>4</sub>Si); δ (ppm): 10.1 (s, 1H), 8.71 (s, 1H), 8.46-8.50 (m, 1H), 8.22-8.20 (m, 1H), 7.72-7.80 (m, 1H).

**Acetophenone (7a)**<sup>3</sup>- Colorless liquid; <sup>1</sup>H NMR (CDCl<sub>3</sub>, 25°C vs Me<sub>4</sub>Si); δ (ppm): 7.93-7.90 (m, 2H), 7.55-7.50 (m, 1H), 7.46-7.40 (m, 2H), 2.59 (s, 3H).

**2-Pentanone (7b)**<sup>6</sup> - Colorless liquid; <sup>1</sup>H NMR (CDCl<sub>3</sub>, 25°C vs Me<sub>4</sub>Si); δ (ppm): 0.92 (t, J = 6.2 Hz, 3H), 1.61(m, 3H), 2.15(s, 3H), 2.40(t, J = 6.6 Hz, 2H).

**2-octanone (7c)**<sup>6</sup> - Colorless liquid; <sup>1</sup>H NMR (CDCl<sub>3</sub>, 25°C vs Me<sub>4</sub>Si); δ (ppm): 0.89 (t, J = 6.4 Hz, 3H), 1.22-1.39 (m, 6H), 1.53-1.64 (m, 2H), 2.11(s, 3H), 2.42 (t, J = 8.4 Hz, 2H).

**Cyclopentanone (7d)**<sup>4</sup> - Colorless liquid; <sup>1</sup>H NMR (CDCl<sub>3</sub>, 25°C vs Me<sub>4</sub>Si); δ (ppm): 1.90-1.78 (m, 4H), 2.16-2.00 (m, 4H).

## References-

1. R. Chebolu, N. D. Kommi, D. Kumar, N. Bollineni, A.K. Chakraborti, *J. Org. Chem.* **2012**, *77*, 10158–10167.
2. K. Bahrami, M. M. Khodaei, A. Nejati, *Green Chem.*, **2010**, *12*, 1237–1241.
3. G. Zhang , Y. Wang , X. Wen , C. Ding, Y. Li, *Chem. Commun.*, **2012**, *48*, 2979-2981.\
4. M. L. Kantam, R. Arundhathi, P. R. Likhar, D. Damodara *Adv. Synth. Catal.* **2009**, *351*, 2633 – 2637
5. B. Yu, Y. Zhao, Ho. Zhang, J. Xu, L. Hao, X. Gao and Z. Liu, *Chem. Commun.*, **2014**, *50*, 2330—2333.
6. Z. Liu, Z.-C. Chen, and Q.-G. Zheng **2003**, *5*, 3321-3323.
